# Supplementary material for: An efficient cell separation system using 3D-asymmetric microelectrodes
Source: Royal Society of Chemistry journal article supplement (doi:10.1039/b506803g), 2005-01-01
Supplement: b506803g.pdf [file b506803g.pdf]

## Supplementary information

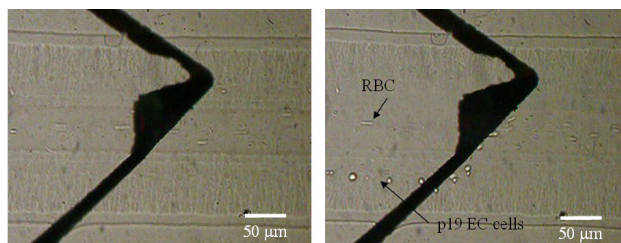

Image from the movie for cell separation

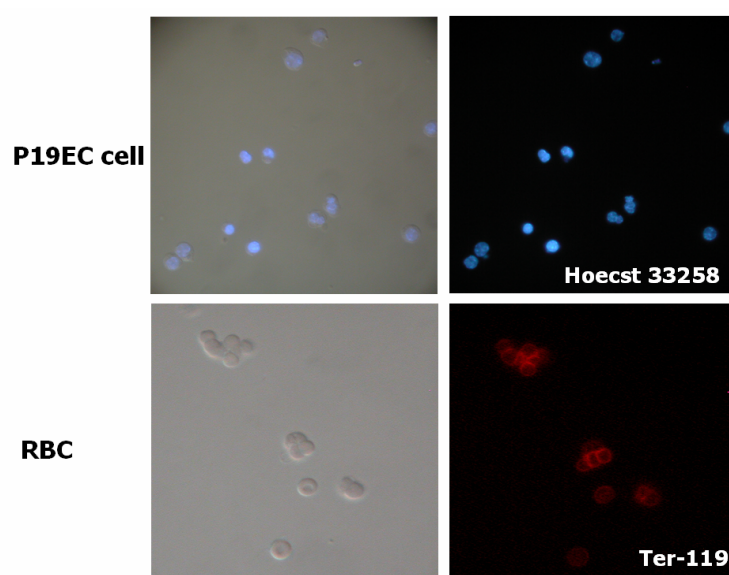

Cell separation results for P19EC cells and RBCs using MACS
